# Supplementary material for: Micro-Scale Vacuum Compression Molding as a Predictive Screening Tool of Protein Integrity for Potential Hot-Melt Extrusion Processes
Source: Pharmaceutics. 2023 Feb 22;15(3):723. doi: 10.3390/pharmaceutics15030723 (PMC10054806; doi:10.3390/pharmaceutics15030723)
Supplement: Supplementary file 1 [file pharmaceutics-15-00723-s001.zip › pharmaceutics-2200720-supplementary.pdf]

Supplementary Materials

# Micro-Scale Vacuum Compression Molding as a Predictive Screening Tool of Protein Integrity for Potential Hot-Melt Extrusion Processes

Katharina Dauer and Karl G. Wagner

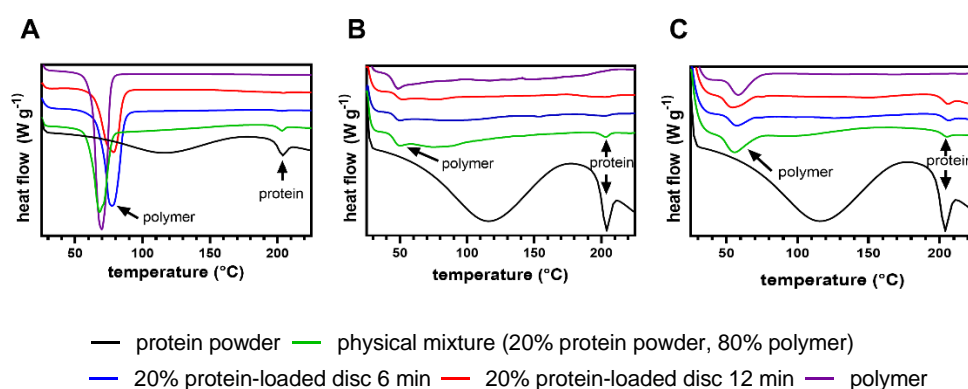

**Figure S1.** DSC thermograms (25 to 230 $^{\circ}\text{C}$ ) of lysozyme powder (black), polymers (purple) (A: PEG 20,000, B: PLGA, and C: EVA), physical mixture composed of 20% lysozyme powder and 80% polymer (green), and 20% lysozyme-loaded disc produced by VCM in 6 min (blue) or 12 min (red).

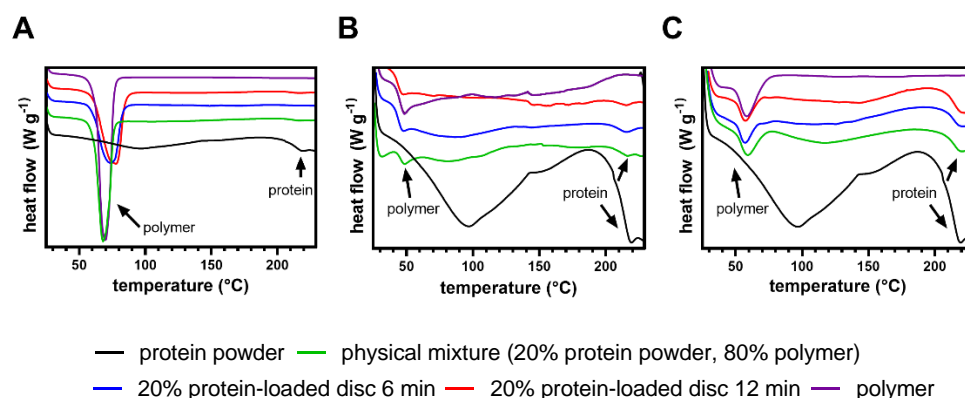

**Figure S2.** DSC thermograms (25 to 230 $^{\circ}\text{C}$ ) of BSA powder (black), polymers (purple) (A: PEG 20,000, B: PLGA, and C: EVA), physical mixture composed of 20% BSA powder and 80% polymer (green), and 20% BSA-loaded disc produced by VCM in 6 min (blue) or 12 min (red).

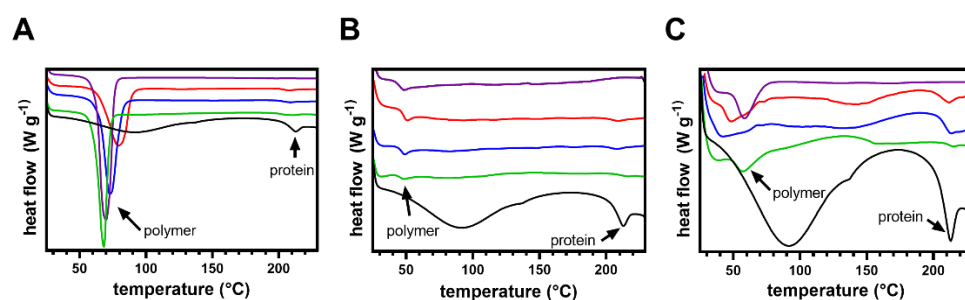

— protein powder — physical mixture (20% protein powder, 80% polymer)  
 — 20% protein-loaded disc 6 min — 20% protein-loaded disc 12 min — polymer

**Figure S3.** DSC thermograms (25 to 230°C) of human insulin powder (black), polymers (purple) (A: PEG 20,000, B: PLGA, and C: EVA), physical mixture composed of 20% human insulin powder and 80% polymer (green), and 20% human insulin-loaded disc produced by VCM in 6 min (blue) or 12 min (red).

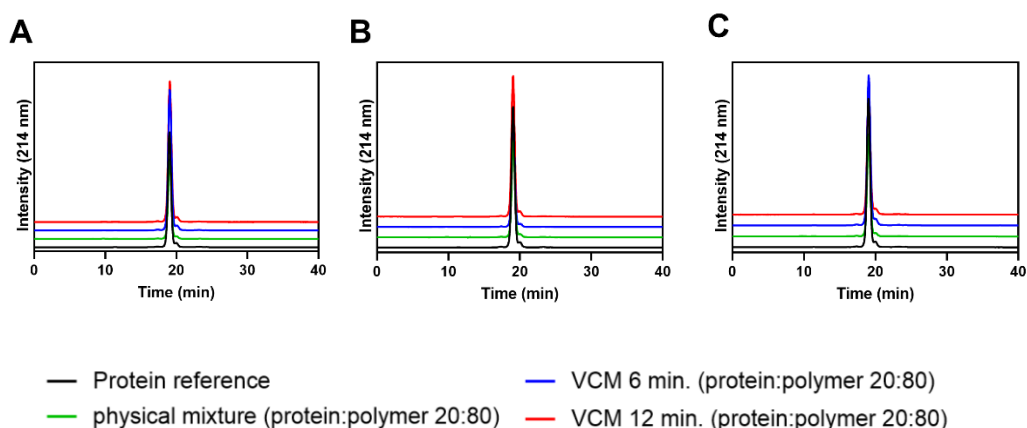

**Figure S4.** Chromatograms of SEC analysis; lysozyme powder (initial: black), physical mixture composed of 20% lysozyme and 80% polymer (green); and 20% lysozyme-loaded discs with the polymers: A: PEG 20,000 at 65°C; B: PLGA at 70°C; C: EVA at 70°C prepared by VCM in 6 min (blue) or 12 min (red).

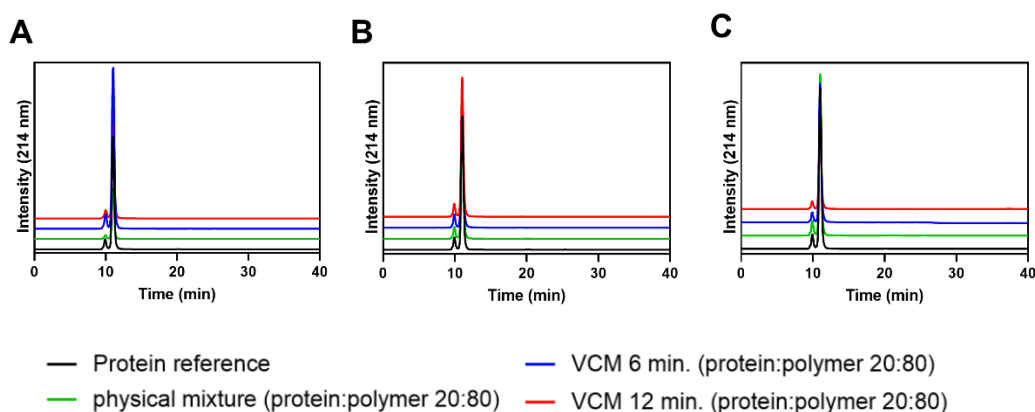

**Figure S5.** Chromatograms of SEC analysis; BSA powder (initial: black), physical mixture composed of 20% BSA and 80% polymer (green); and 20% BSA-loaded discs with the polymers: A: PEG 20,000 at 65°C; B: PLGA at 70°C; C: EVA at 70°C prepared by VCM in 6 min (blue) or 12 min (red).
